# Supplementary material for: SSRI antidepressant use potentiates weight gain in the context of unhealthy lifestyles: results from a 4-year Australian follow-up study
Source: PubMed Central journal article supplement — BMJ Open. 2017 Aug 11;7(8):e016224. doi: 10.1136/bmjopen-2017-016224 (PMC5629701; doi:10.1136/bmjopen-2017-016224), 2017-08-11
Supplement: bmjopen-2017-016224supp001.pdf [file bmjopen-2017-016224supp001.pdf]

## Supplemental materials

**Table S1** Sample characteristic by SSRIs use \*

|                               | Non-user    | 1-2 prescriptions/year | >2 prescriptions/year | <i>P</i> value |
|-------------------------------|-------------|------------------------|-----------------------|----------------|
| <i>n</i> (%)                  | 2109 (90.4) | 114 (4.9)              | 111 (4.8)             |                |
| Age (years)                   | 54.0 (14.3) | 55.0 (11.6)            | 55.4 (12.6)           | 0.4818         |
| Baseline weight (kg)          | 79.8 (17.0) | 79.7 (18.2)            | 82.2 (19.1)           | 0.3717         |
| Follow-up weight (kg)         | 80.3 (17.3) | 81.2 (18.0)            | 84.9 (21.2)           | 0.0245         |
| Annual weight gain (kg)       | 0.1 (1.3)   | 0.4 (2.1)              | 0.6 (1.9)             | 0.0002         |
| Income (\$)                   |             |                        |                       |                |
| <20000                        | 451 (21.5)  | 36 (31.6)              | 41 (36.9)             |                |
| 20000-60000                   | 981 (46.7)  | 45 (39.5)              | 46 (41.4)             |                |
| >60000                        | 599 (28.5)  | 27 (23.7)              | 20 (18.0)             |                |
| Not stated                    | 71 (3.4)    | 6 (5.3)                | 4 (3.6)               | 0.0008         |
| Smoking status                |             |                        |                       |                |
| Non smoker                    | 994 (47.3)  | 38 (33.3)              | 54 (48.6)             |                |
| Current or ex-smoker          | 1107 (52.7) | 76 (66.7)              | 57 (51.4)             | 0.0131         |
| Physical activity             |             |                        |                       |                |
| Sedentary                     | 519 (27.3)  | 39 (37.1)              | 39 (37.9)             |                |
| Low exercise level            | 696 (36.7)  | 38 (36.2)              | 37 (35.9)             |                |
| Moderate exercise level       | 536 (28.2)  | 17 (16.2)              | 23 (22.3)             |                |
| High exercise level           | 147 (7.7)   | 11 (10.5)              | 4 (3.9)               | 0.0130         |
| Depression (baseline)         |             |                        |                       |                |
| No depressive symptoms        | 1897 (90.7) | 70 (63.6)              | 71 (65.1)             |                |
| Mild depression               | 138 (6.6)   | 19 (17.3)              | 26 (23.9)             |                |
| Moderate to severe depression | 57 (2.7)    | 21 (19.1)              | 12 (11.0)             | 0.0000         |
| Depression (follow-up)        |             |                        |                       |                |
| No depressive symptoms        | 1745 (85.3) | 60 (53.6)              | 60 (56.1)             |                |
| Mild depression               | 196 (9.6)   | 27 (24.1)              | 29 (27.1)             |                |
| Moderate to severe depression | 104 (5.1)   | 25 (22.3)              | 18 (16.8)             | 0.0000         |
| Any antidepressant †          | 0.3 (1.5)   | 1.7 (2.7)              | 6.5 (3.2)             | 0.0000         |
| TCAAs †                       | 0.1 (1.0)   | 0.3 (1.6)              | 0.1 (0.5)             | 0.0996         |

|                        |           |           |           |        |
|------------------------|-----------|-----------|-----------|--------|
| SSRIs †                | 0.0 (0.0) | 0.8 (0.5) | 5.9 (3.1) | 0.0000 |
| Other antidepressant † | 0.2 (1.1) | 0.6 (2.1) | 0.4 (1.3) | 0.0001 |

---

\* Values are n (%) or mean (SD)

† Annual number of prescriptions

**Table S2** Intake of macronutrients, dietary patterns and lifestyle factors by antidepressants use

|                         | Non-user      | 1-2 prescriptions/year | >2 prescriptions/year | <i>P</i> value |
|-------------------------|---------------|------------------------|-----------------------|----------------|
| Energy intake (kJ/d) *  | 8,628.2(62.3) | 8,697.3(201.6)         | 9,160.1(189.4)        | 0.029          |
| Fat (g/d) *             | 87.3(0.7)     | 87.3(2.3)              | 92.6(2.2)             | 0.064          |
| Protein (g/d) *         | 94.8(0.7)     | 94.8(2.4)              | 98.6(2.3)             | 0.290          |
| Carbohydrate (g/d) *    | 209.5(2.3)    | 214.0(7.3)             | 225.3(6.8)            | 0.085          |
| Prudent pattern score * | 0.02(0.02)    | 0.08(0.07)             | -0.12(0.07)           | 0.103          |
| Western pattern score * | -0.03(0.02)   | -0.04(0.07)            | 0.14(0.06)            | 0.037          |
| Sedentary (%)           | 27.0          | 34.7                   | 34.5                  | 0.013          |
| Smoking status (%)      |               |                        |                       |                |
| Non-smoker              | 47.7          | 36.4                   | 46.2                  | 0.003          |
| Ex-smoker               | 36.7          | 48.1                   | 32.6                  |                |
| Current smoker          | 15.6          | 15.5                   | 21.2                  |                |

\* Values are age and gender adjusted mean (SE).

**Table S3** Association between antidepressant use and body weight (kg) from mixed linear model \*

|                    | Non-user | Low user          | High user               | <i>P</i> value |
|--------------------|----------|-------------------|-------------------------|----------------|
| Any antidepressant | Ref      | -0.32(-2.81-2.16) | <b>4.40(1.97-6.83)</b>  | 0.002          |
| TCAs               | Ref      | -2.81(-6.56-0.94) | 0.87(-4.52-6.25)        | 0.571          |
| SSRIs              | Ref      | 1.45(-1.66-4.56)  | <b>4.20(1.06-7.35)</b>  | 0.007          |
| Other              | Ref      | 2.88(-1.43-7.18)  | <b>7.14(3.05-11.23)</b> | <0.001         |

\* Values represent regression coefficients (95%CI). Results are from mixed linear models adjusted for age, sex, income, depression, smoking, physical activity, dietary patterns (follow-up). In the model, age, income, depression and smoking were treated as time-variant variables.

**Figure S1** Factor loadings of dietary patterns

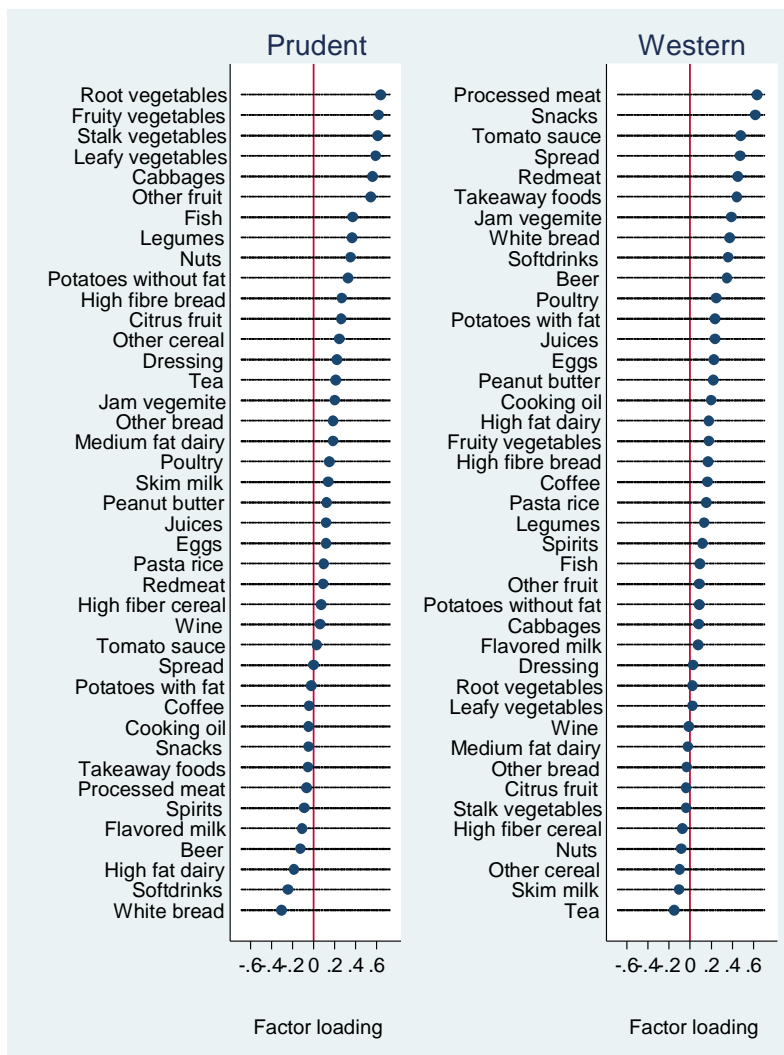

**Figure S2** Interaction between any antidepressant use and age in relation to weight gain

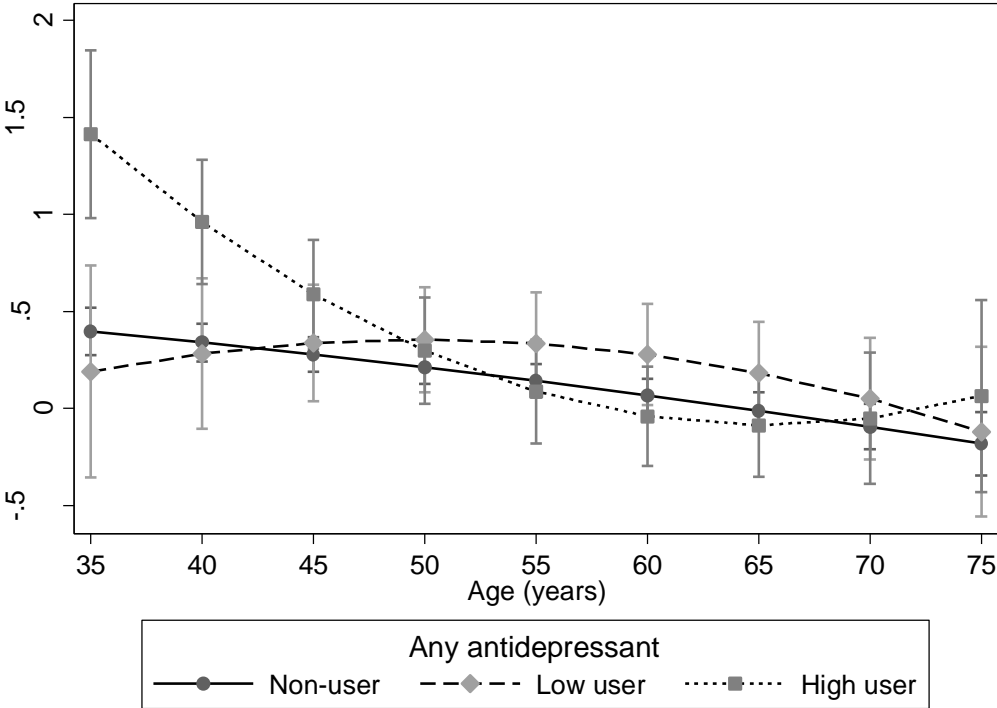

Values adjusted for covariates included in model 3 of Table 3.
